# Supplementary material for: Benzoyl methyl phosphate as an efficient reagent for the selective monobenzoylation of N-Bz-FTY720
Source: Royal Society of Chemistry journal article supplement (doi:10.1039/c4ra02401j), 2014-01-01

## Supporting Information

### **Benzoyl methyl phosphate as efficient reagents for the selective monobenzoylation of *N*-Bz-FTY720**

Hidemasa Hikawa,\* Maiko Hamada, Yuusaku Yokoyama\* and Isao Azumaya

*Faculty of Pharmaceutical Sciences, Toho University, Funabashi, Chiba 274-8510, Japan*  
*hidemasa.hikawa@phar.toho-u.ac.jp and yokoyama@phar.toho-u.ac.jp*

|                                                                                                             |              |
|-------------------------------------------------------------------------------------------------------------|--------------|
| <b>1. Table of contents</b>                                                                                 | <b>S1</b>    |
| <b>2. Copies of <math>^1\text{H}</math> and <math>^{13}\text{C}</math> NMR spectra of the all compounds</b> | <b>S2-S6</b> |

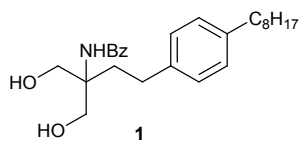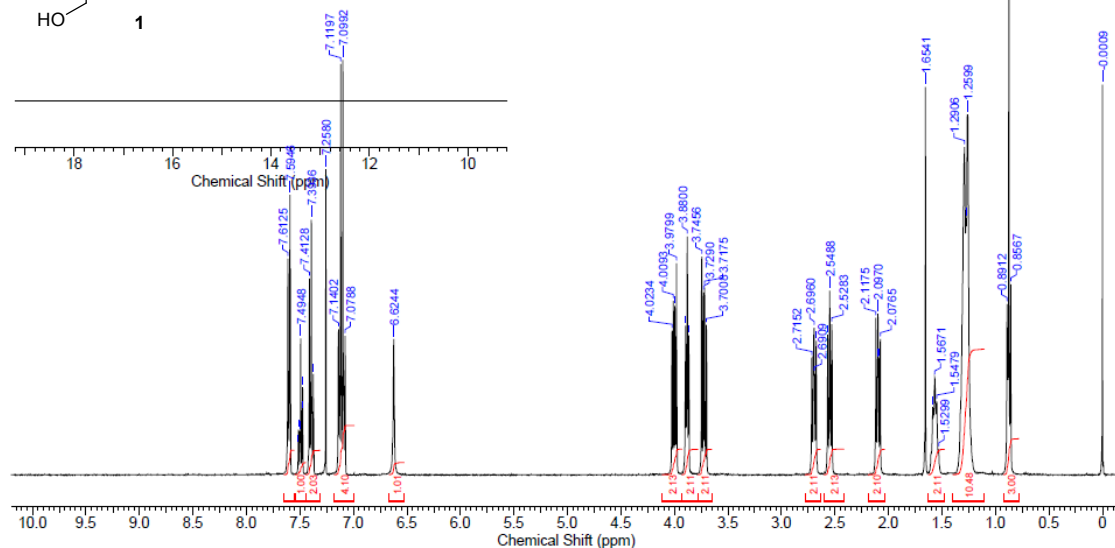

Comment: Y0754126A  
Nucleus: 1H  
Origin: spect

Frequency (MHz): 400.03  
Sweep Width (Hz): 8388.75

Date: 09 Feb 2012 18:42:24  
Solvent: CHLOROFORM-d  
Number of Transients: 16  
Pulse Sequence: zg30\_Bruker\_AVANCE400M

Operator: Maiko Hamada

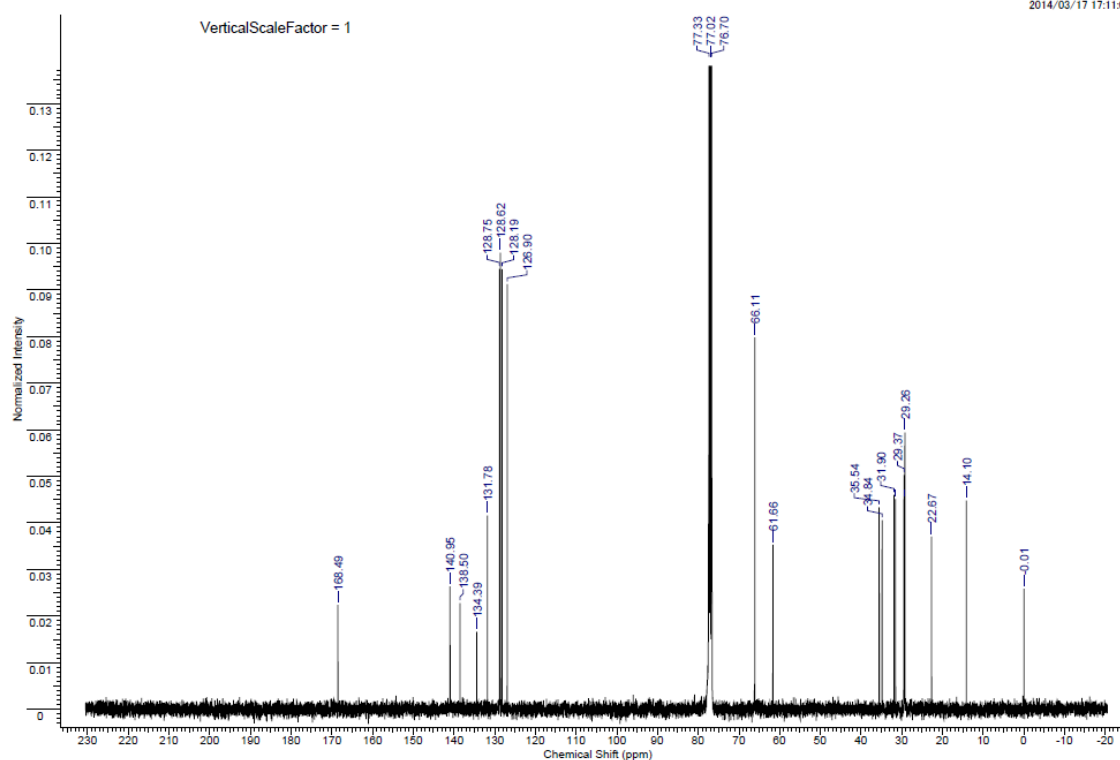

2014/03/17 17:11:09

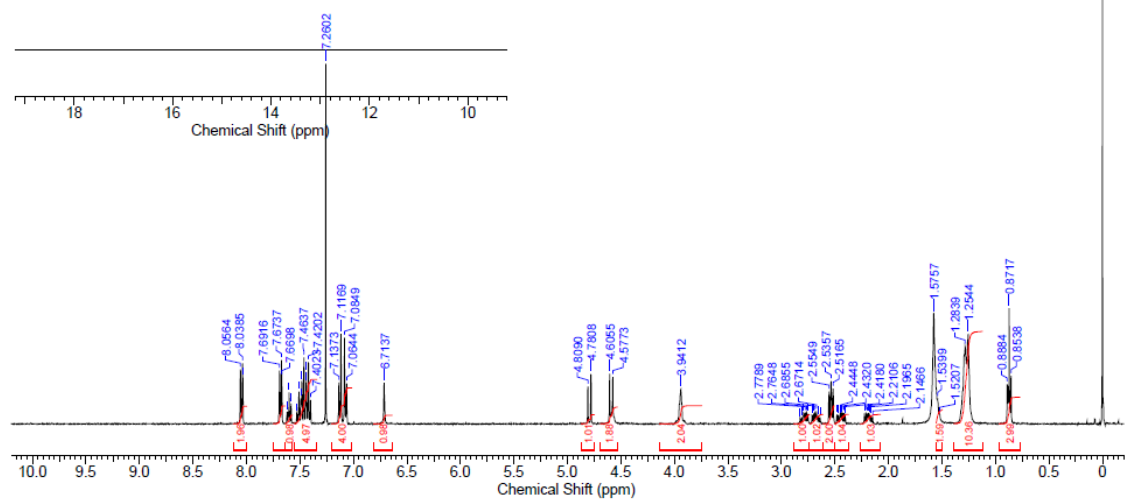

Operator :Maiko  
Hamada

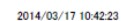

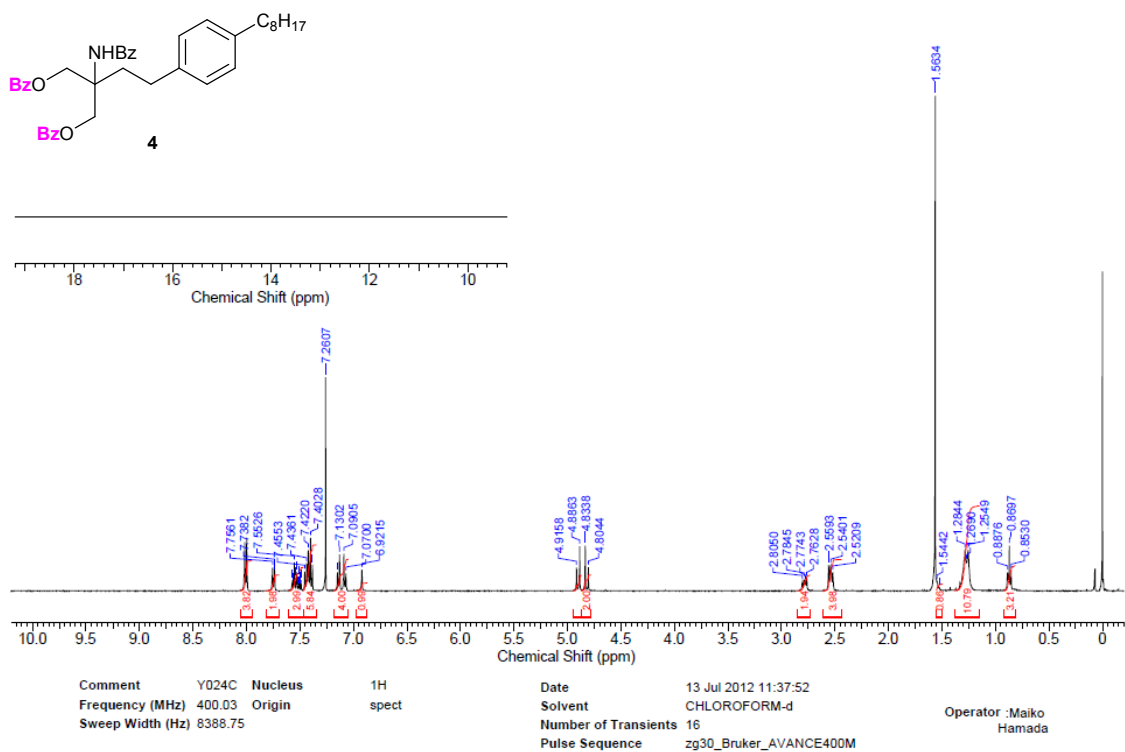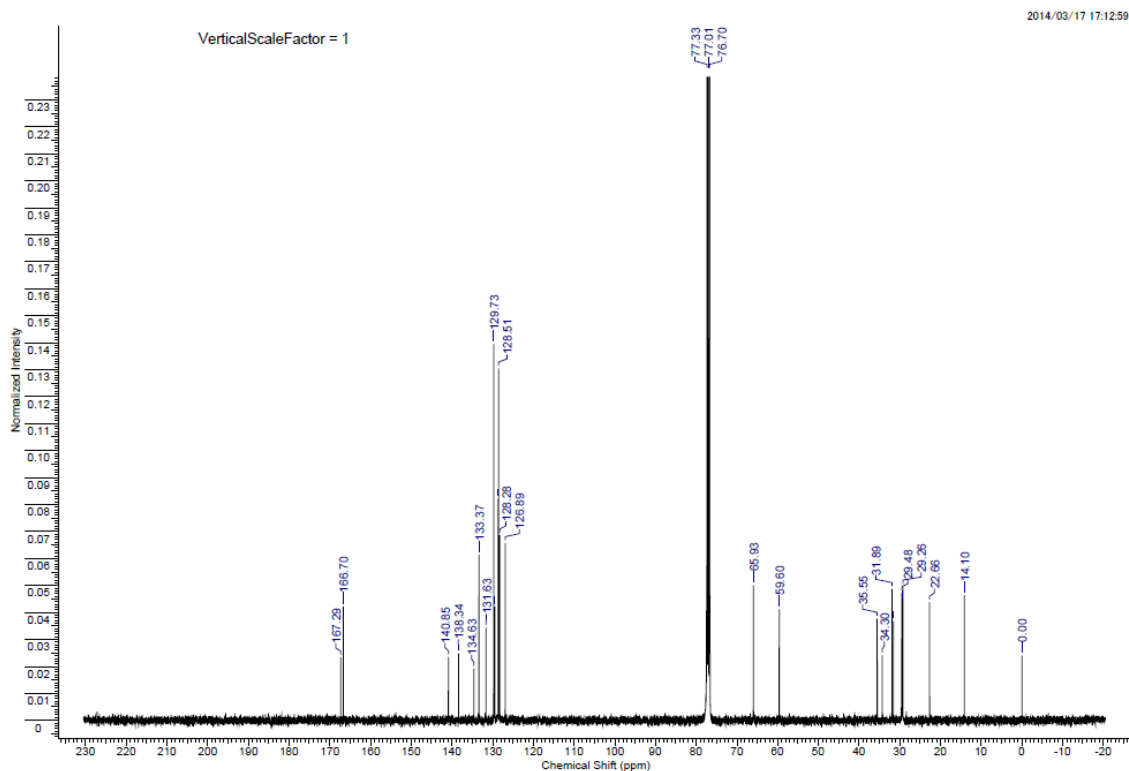

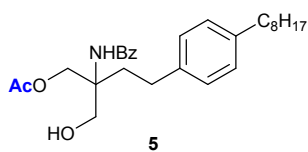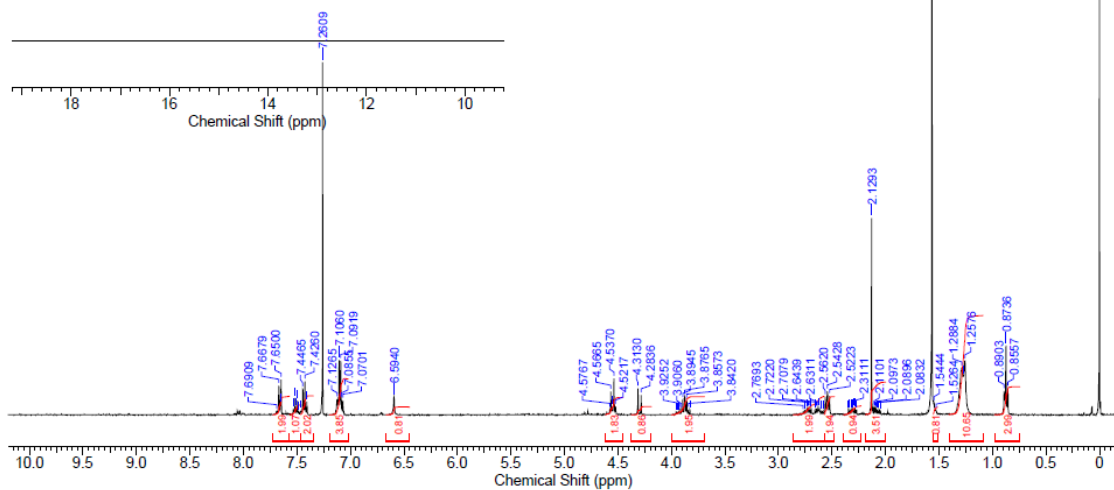

Comment Y024D Nucleus 1H  
Frequency (MHz) 400.03 Origin spect  
Sweep Width (Hz) 8388.75

Date 13 Jul 2012 11:46:24  
Solvent CHLOROFORM-d  
Number of Transients 16  
Pulse Sequence zg30\_Bruker\_AVANCE400M

Operator :Maiko  
Hamada

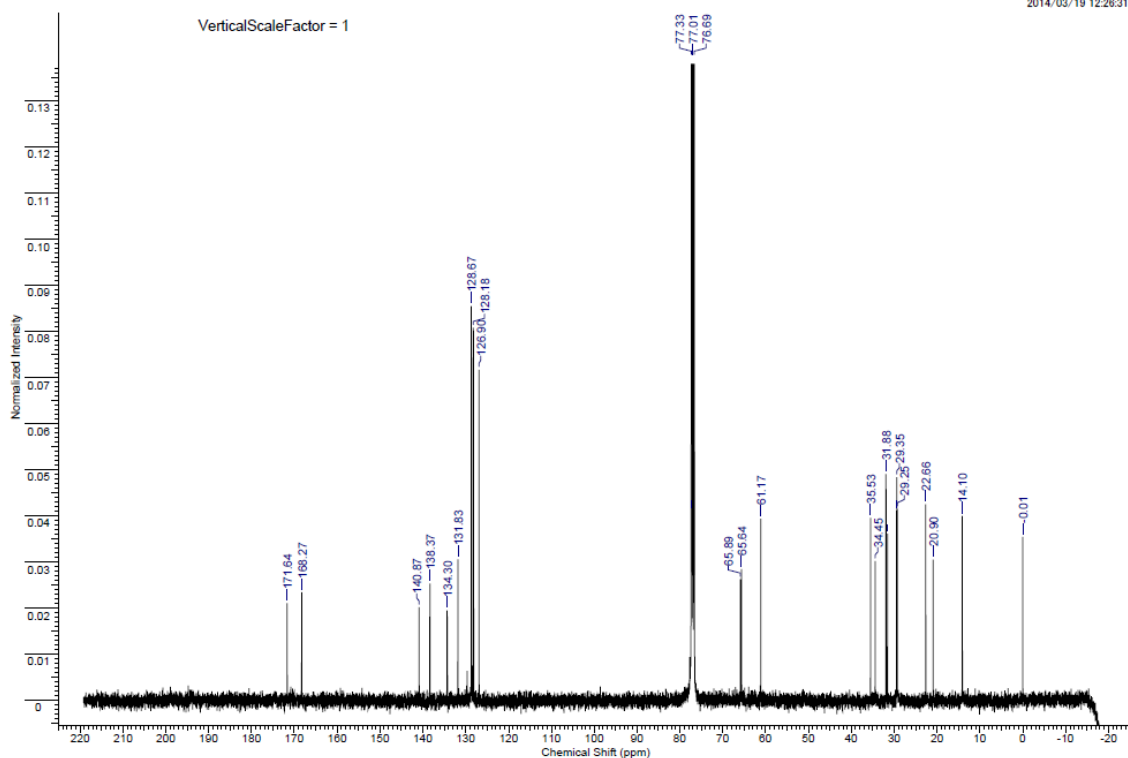

2014/03/19 12:26:31

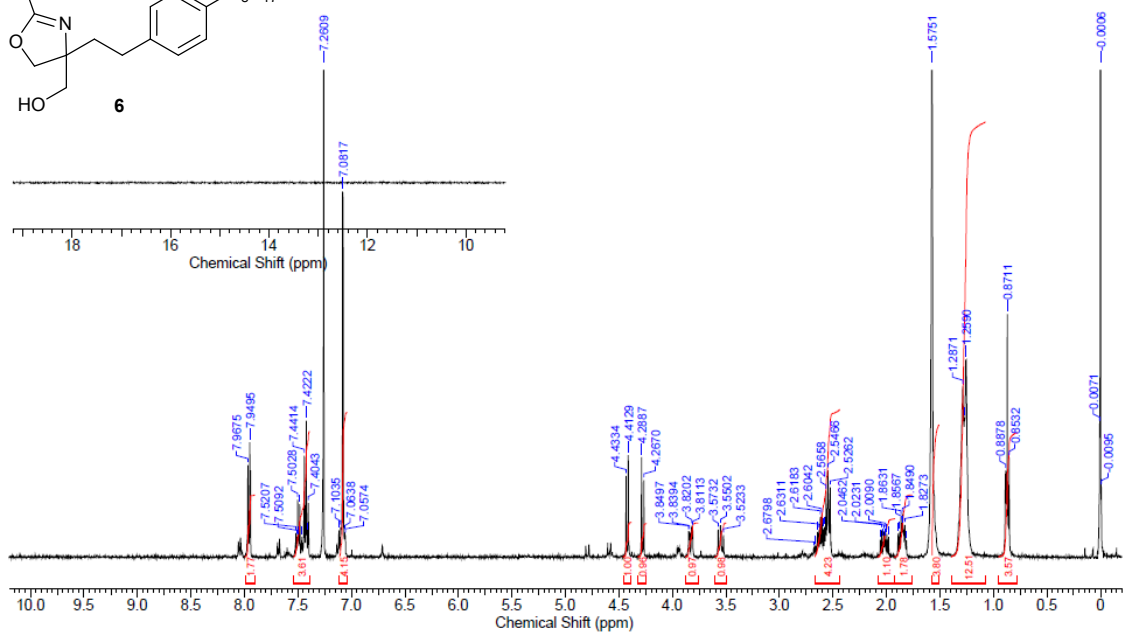

Date 20 Aug 2012 15:47:28  
Solvent CHLOROFORM-d  
Number of Transients 16  
Pulse Sequence zg30\_Bruker\_AVANCE400M

Operator :Maiko  
Hamada

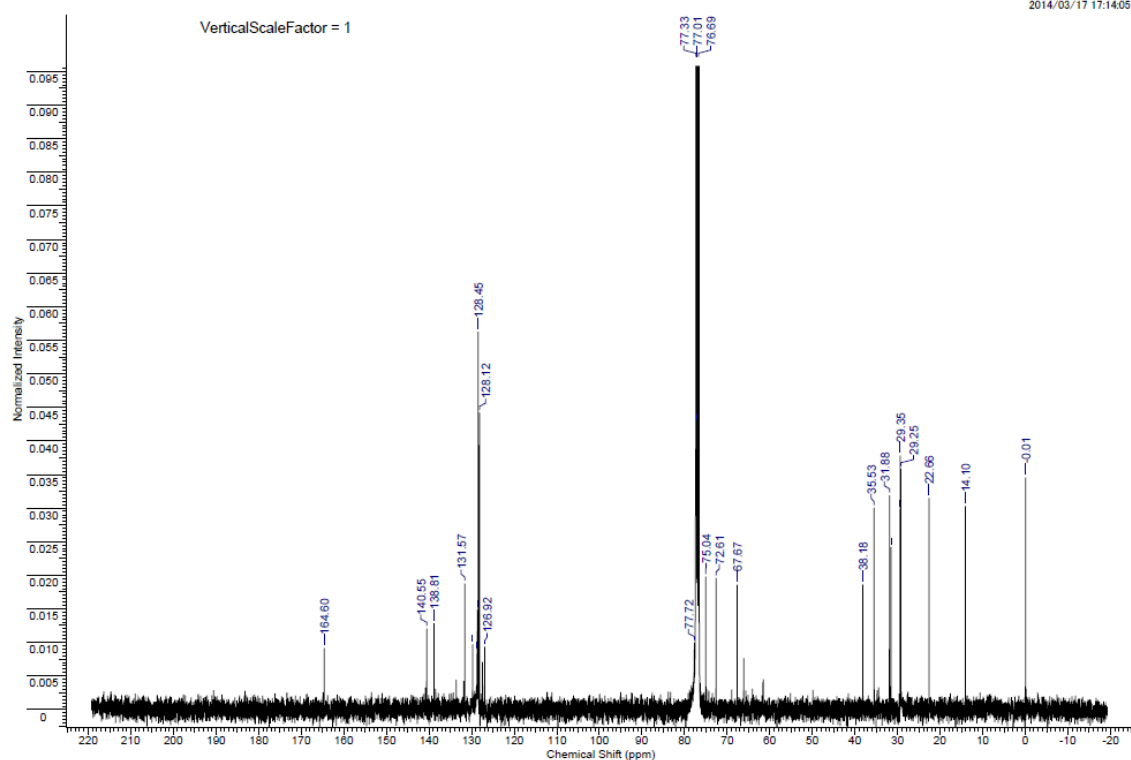

Supplement: c4ra02401j1.pdf [file c4ra02401j1.pdf]
